# Supplementary material for: Renin-Angiotensin System Single Nucleotide Polymorphisms Are Associated with Bladder Cancer Risk
Source: MDPI journal article supplement (doi:10.3390/curroncol28060396), 2021-11-15
Supplement: s1 [file s1]

## Article

# Renin-Angiotensin System Single Nucleotide Polymorphisms are Associated with Bladder Cancer Risk

Maria Samara, Maria Papathanassiou, Ioanna Farmakioti, Maria Anagnostou, Maria Satra, Lampros Mitrakas, Dimitrios Anastasiou, Georgios Chasiotis, Agamemnon Christopoulos, Athanasios Anagnostou, Anastasios Christodoulou, Alexandros Daponte, Maria Ioannou, George Koukoulis, Vassilios Tzortzis and Panagiotis J. Vlachostergios

**Table S1.** PCR Amplification conditions.

| Temperature (oC) | Time (mins) | Cycles |
|------------------|-------------|--------|
| 94               | 5           | 1      |
| 94               | 1           | 40     |
| 56               | 1           |        |
| 72               | 1           |        |
| 72               | 10          | 1      |
| 18               | hold        |        |

**Table S2.** Primer sequences for each SNP.

| Primer name | Direction (5'-3') | Sequence                  |
|-------------|-------------------|---------------------------|
| ANG         | F                 | GATGCGCACAAGGTCCTG        |
| ANG         | R                 | CAGGGTGCTGTCCACACTGGCTCGC |
| AT1R        | F                 | TTGAGGTTGAGTGACATGTTCGA   |
| AT1R        | R                 | CGGTTCACTCCACATAATGCA     |
| AT2R        | F                 | GGATTCAGATTTCTCTTTGAA     |
| AT2R        | R                 | GCATAGGAGTATGATTTAATC     |
| REN         | F                 | CGTAGTGCCATTTTATAGGAAC    |
| REN         | R                 | AACACCAAAGCAGGCTTAA       |
